# Supplementary material for: Single-cell sequencing analysis characterizes common and cell-lineage-specific mutations in a muscle-invasive bladder cancer
Source: PubMed Central journal article supplement (PMC3626503; doi:10.1186/2047-217x-1-12), 2012-08-14

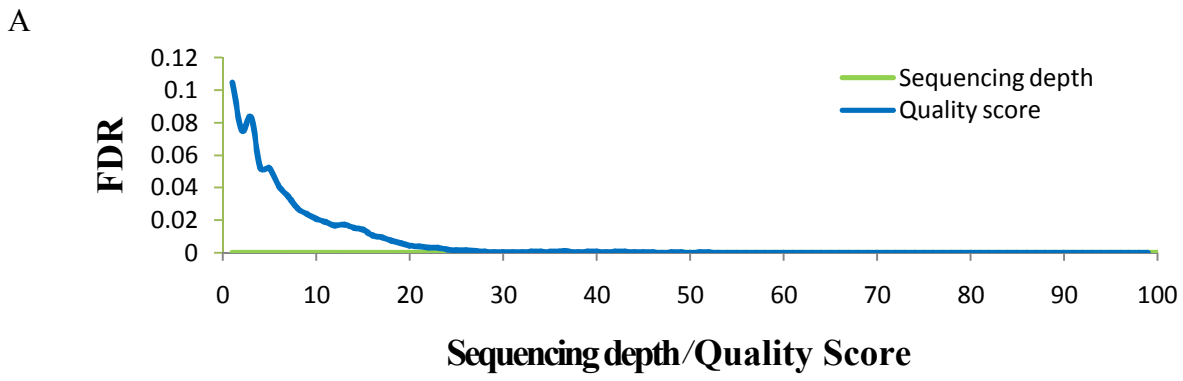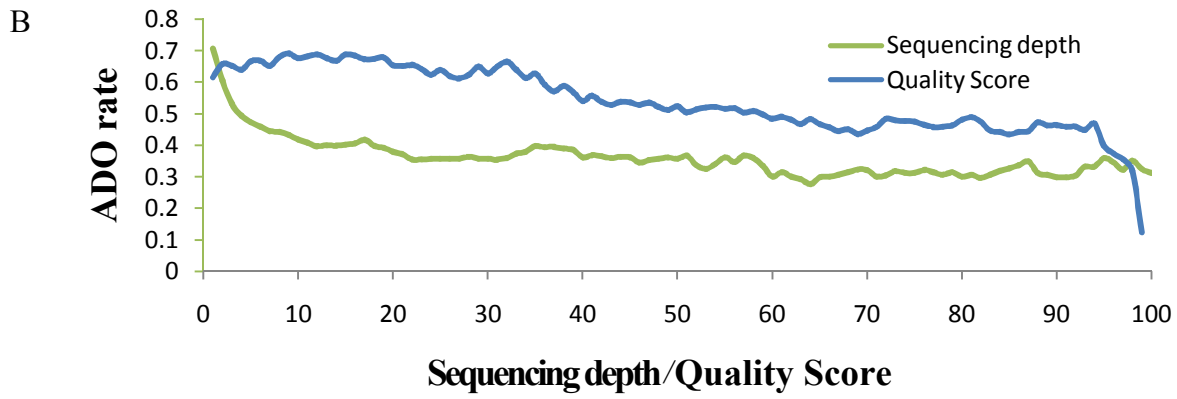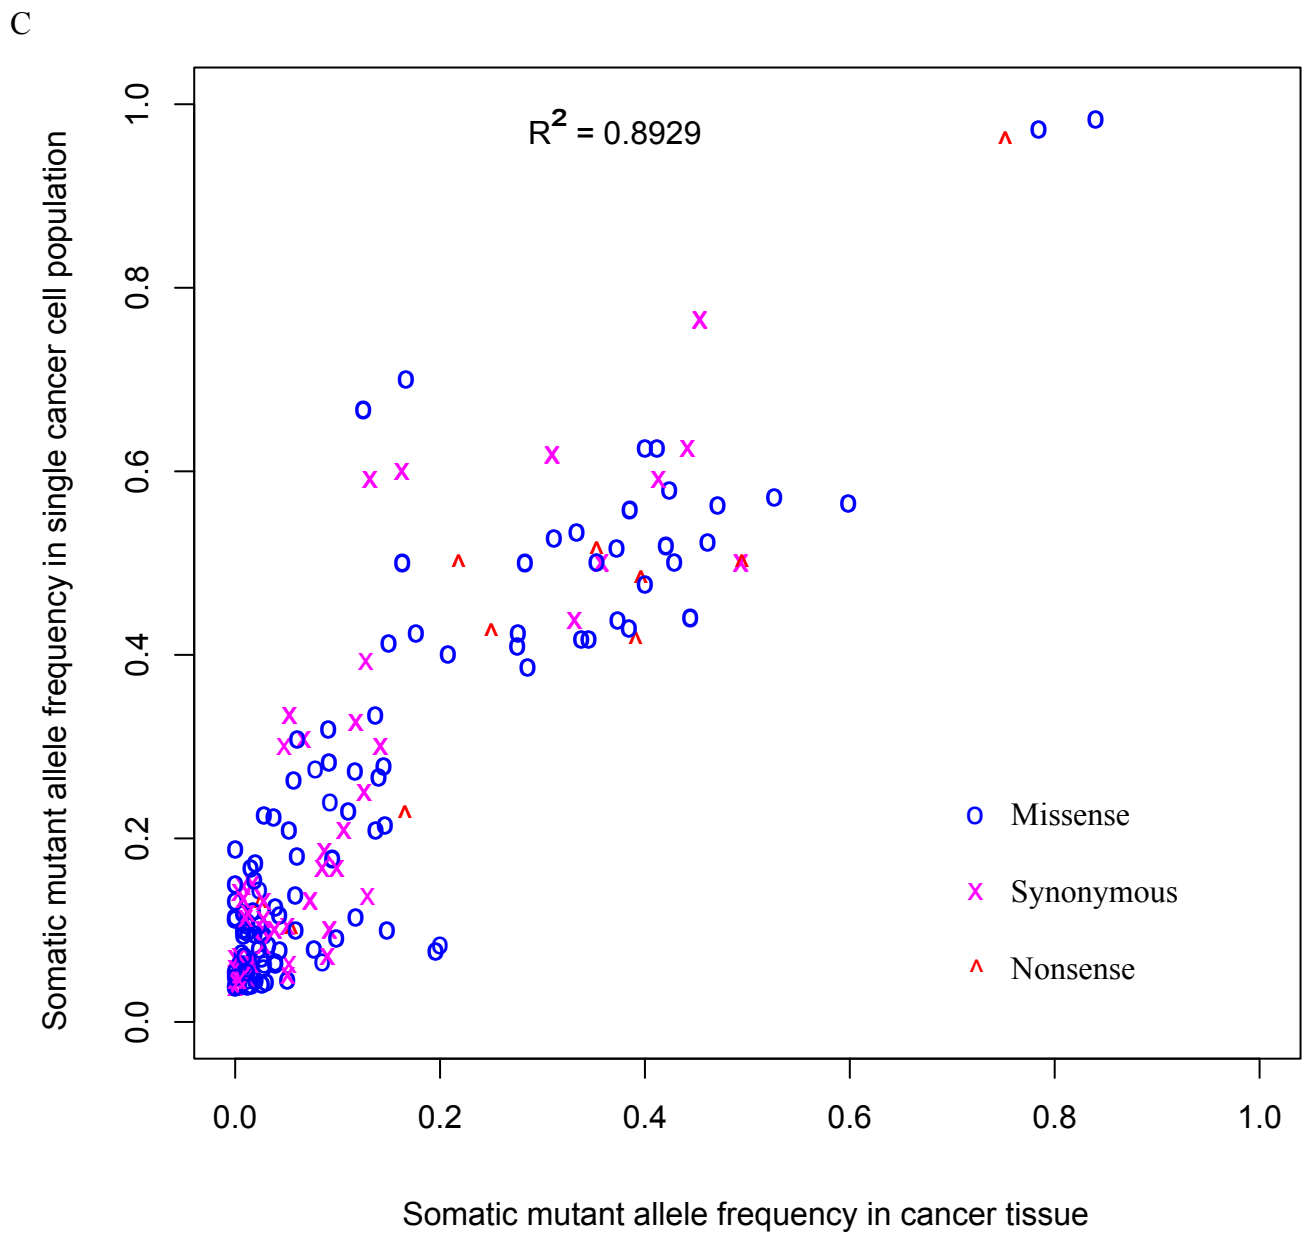

Supplement: 2047-217X-1-12-S6.pdf [file 2047-217X-1-12-S6.pdf]
